# Supplementary material for: Highly selective acetone fluorescent sensors based on microporous Cd(ii) metal–organic frameworks
Source: Royal Society of Chemistry journal article supplement (doi:10.1039/c2jm35273g), 2012-01-01
Supplement: c2jm35273g.pdf [file c2jm35273g.pdf]

# Highly selective acetone fluorescent sensors based on microporous Cd(II) metal-organic frameworks

Fei-Yan Yi, Weiting Yang, and Zhong-Ming Sun\*

## Supporting Materials

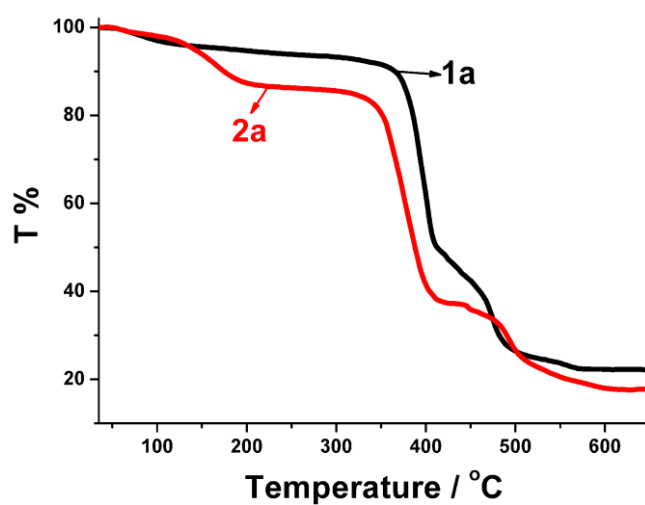

Figure S1. Thermogravimetric analyses of **1a** and **2a**.

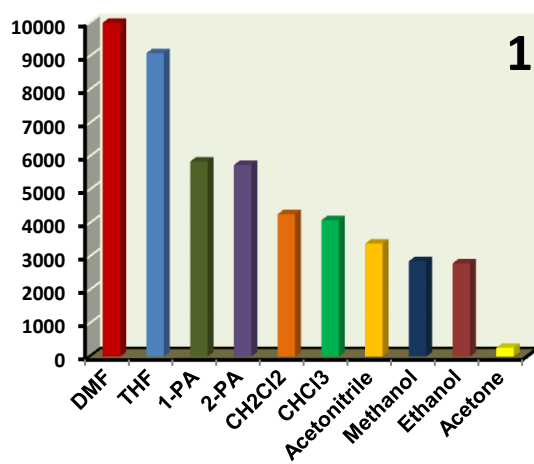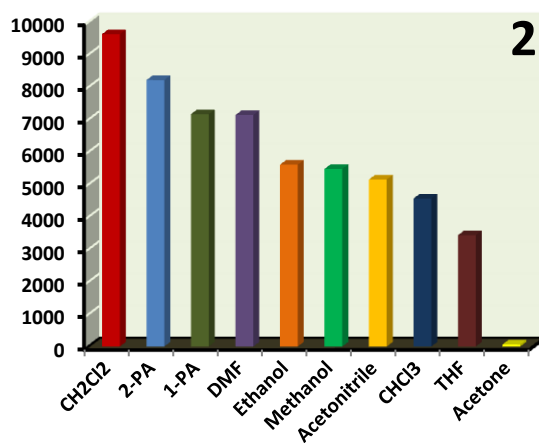

**Figure S2.** The luminescence intensity of **1a** ( $\lambda_{\text{max}} = 372$  nm) and **2a** ( $\lambda_{\text{max}} = 367$  nm) in various pure solvents when excited at 299 nm, and 292 nm, respectively.
